# Supplementary material for: Quasi-solid-state highly stretchable circular knitted MnO2@CNT supercapacitor
Source: Royal Society of Chemistry journal article supplement (doi:10.1039/d0ra01398f), 2020-01-01
Supplement: d0ra01398f1.pdf [file d0ra01398f1.pdf]

## Supporting information

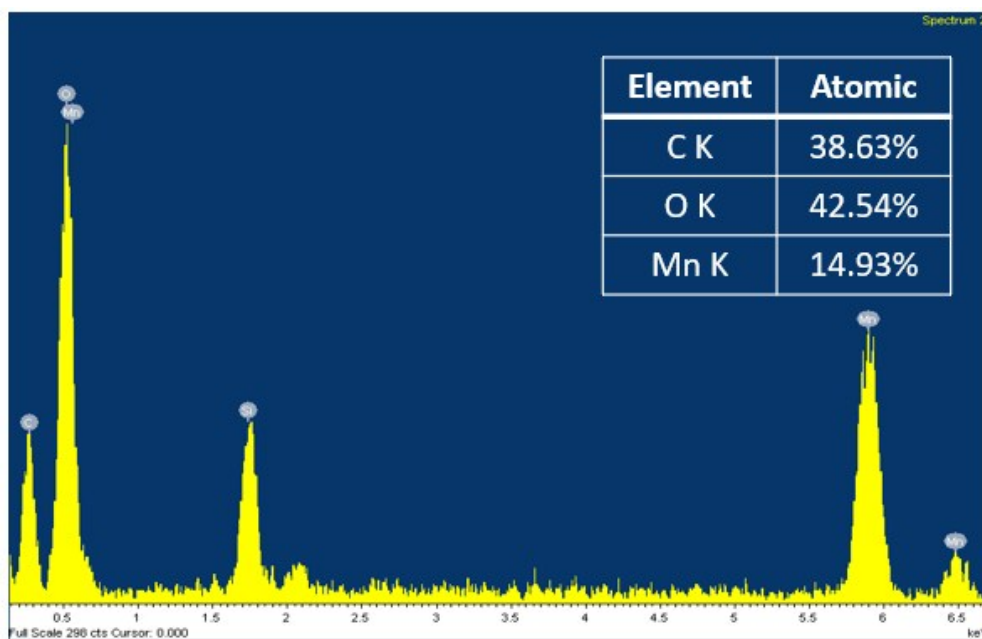

**Figure S1.** EDS analysis for knitted CNT@MnO<sub>2</sub> fiber supercapacitor, EDS analysis show that the atomic ratio of C, O, Mn are 38.63%, 42.54%, and 14.93% respectively.

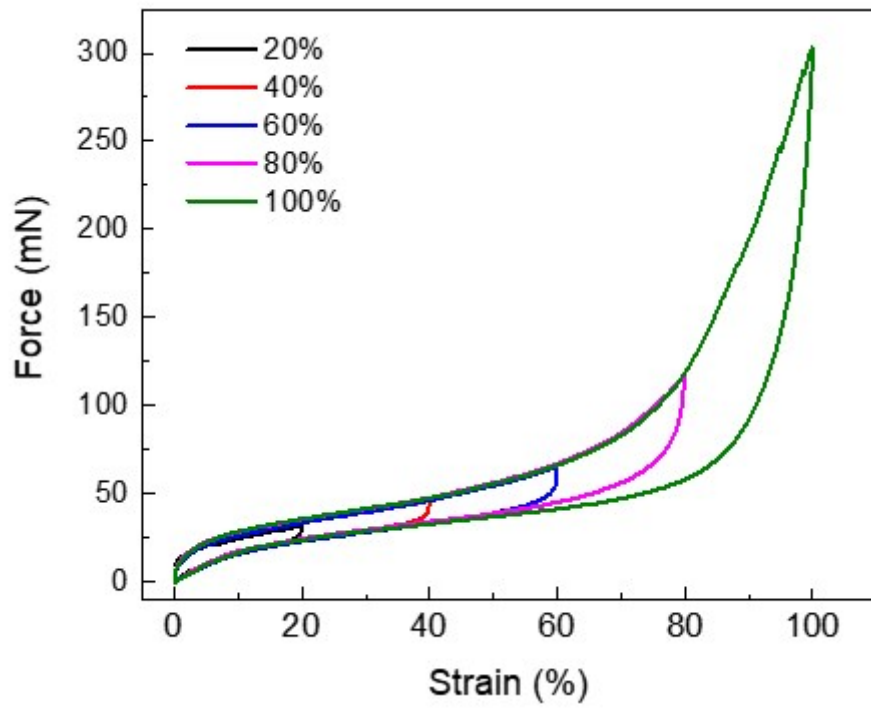

**Figure S2.** Stress-strain curves of one-bodyknitted  $\text{MnO}_2@\text{CNT}$  fiber supercapacitor measured for stretched states ( $\epsilon=20, 40, 60, 80, 100\%$ ).

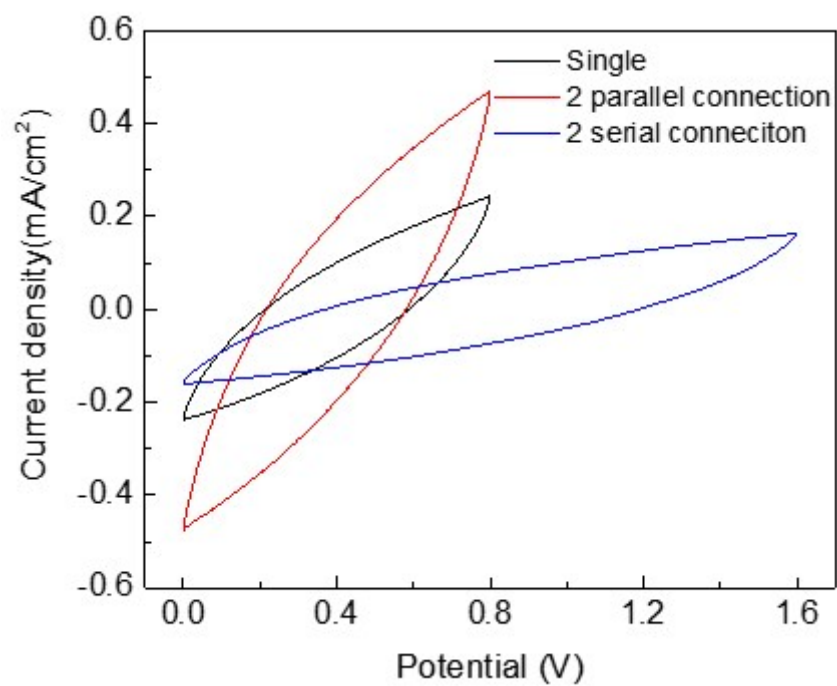

**Figure S3.** CV curves were measured in parallel and series connection compared to single connection.

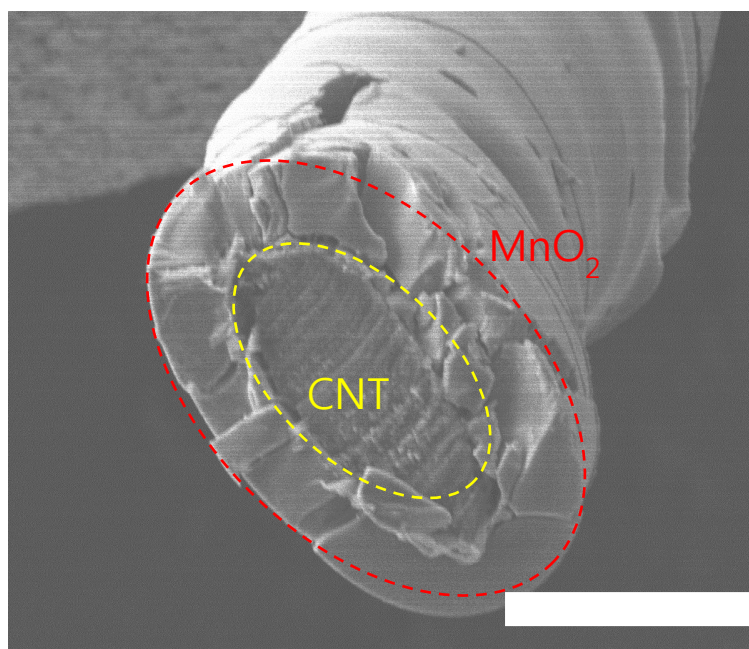

**Figure S4.** The cross-section SEM image of MnO<sub>2</sub>@CNT single fiber

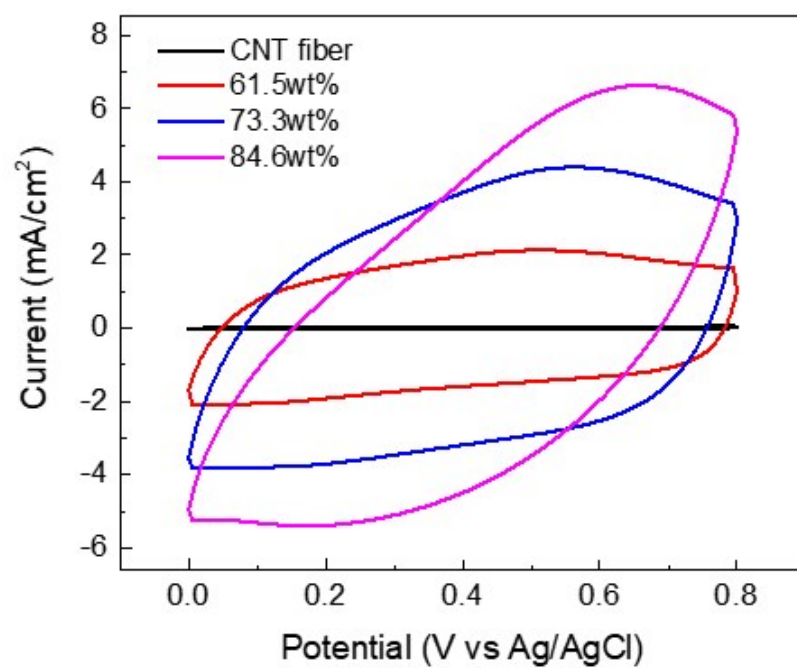

**Figure S5.** CV curves measured from 10mV/s of MnO<sub>2</sub>@CNT knitted fiber for gravimetric specific capacitance (bare CNT fiber, 61.5wt%, 73.3wt%, 84.6wt%, respectively)
